# Supplementary material for: Central Nervous System Progression in Primary Vitreoretinal Lymphoma with Bilateral and Unilateral Involvement: A Systematic Review and Meta-Analysis
Source: MDPI journal article supplement (doi:10.3390/cancers14122967), 2022-06-16
Supplement: s1 [file s1]

# Supplementary Material: Central Nervous System Progression in Primary Vitreoretinal Lymphoma with Bilateral and Unilateral Involvement: A Systematic Review and Meta-Analysis

Josephus L. M. van Rooij, Klaudia A. Tokarska, Ninette H. ten Dam-van Loon, Peter H. Wessels, Tatjana Seute, Monique C. Minnema and Tom J. Snijders

**Table S1.** Search strategy.

| Database      | Search strategy                                                                                                                                                                                                                                                                                                                                                                                                                                                                                                                                                                                                                                                                                | Results     |
|---------------|------------------------------------------------------------------------------------------------------------------------------------------------------------------------------------------------------------------------------------------------------------------------------------------------------------------------------------------------------------------------------------------------------------------------------------------------------------------------------------------------------------------------------------------------------------------------------------------------------------------------------------------------------------------------------------------------|-------------|
| <b>Pubmed</b> | ("VRL"[tiab] OR "PVRL"[tiab] OR (("Lymphoma"[Mesh] OR "Lymphoma*"[tiab]) AND ("Eye"[Mesh] OR "Eye"[tiab] OR "Eyes"[tiab] OR "intraocular"[tiab] OR "Vitreoretinal"[tiab] OR "ocular"[tiab] OR "vitreous retinal"[tiab]))) AND ("Central Nervous System"[Mesh] OR "Central Nervous System Neoplasms"[Mesh:NoExp] OR "Brain Neoplasms"[Mesh] OR "Central Nervous System"[tiab] OR "Central nerve System"[tiab] OR "CNS"[tiab] OR "brain"[tiab] OR "cerebral"[tiab])                                                                                                                                                                                                                              | <b>924</b>  |
| <b>Embase</b> | ('VRL':ti,ab,kw OR 'PVRL':ti,ab,kw OR (('lymphoma'/exp OR 'Lymphoma*':ti,ab,kw) AND ('eye'/exp OR 'Eye':ti,ab,kw OR 'Eyes':ti,ab,kw OR 'intraocular':ti,ab,kw OR 'Vitreoretinal':ti,ab,kw OR 'ocular':ti,ab,kw OR 'vitreous retinal':ti,ab,kw))) AND ('central nervous system'/exp OR 'central nervous system tumor'/de OR 'brain tumor'/exp OR 'central nervous system cancer'/exp OR 'Central Nervous System':ti,ab,kw OR 'Central nerve System':ti,ab,kw OR 'CNS':ti,ab,kw OR 'brain':ti,ab,kw OR 'cerebral':ti,ab,kw) NOT ('conference abstract'/it OR 'editorial'/it OR 'letter'/it OR 'note'/it) NOT (('animal experiment'/exp OR 'animal model'/exp OR 'nonhuman'/exp) NOT 'human'/exp) | <b>1195</b> |

**Table S2.** Customized QUIPS assessment form.

| Biases                             | Issues to consider for judging                                                                                                                                                                                                                                                                                                                      |
|------------------------------------|-----------------------------------------------------------------------------------------------------------------------------------------------------------------------------------------------------------------------------------------------------------------------------------------------------------------------------------------------------|
| Study participation                | <ol style="list-style-type: none"> <li>1. Source of target population</li> <li>2. Method used to identify population</li> <li>3. Recruitment period</li> <li>4. Place of recruitment</li> <li>5. Inclusion and exclusion criteria</li> <li>6. Baseline characteristics</li> <li>7. Timing of diagnosis (before or after CNS progression)</li> </ol> |
| Study attrition                    | <ol style="list-style-type: none"> <li>1. Proportion of baseline sample available for analysis</li> <li>2. Reasons and potential impact of subjects lost to follow-up</li> <li>3. Outcome and prognostic factor information on lost to follow-up</li> </ol>                                                                                         |
| Prognostic factor (PF) measurement | <ol style="list-style-type: none"> <li>1. Proportion of data on PF available for analysis</li> </ol>                                                                                                                                                                                                                                                |
| Outcome measurement                | <ol style="list-style-type: none"> <li>1. Definition of the outcome</li> <li>2. Valid and reliable measurement of outcome</li> <li>3. Method and setting of outcome measurement</li> </ol>                                                                                                                                                          |
| Study confounding                  | <ol style="list-style-type: none"> <li>1. Important confounders measured</li> <li>2. Definition of the confounding factor</li> <li>3. Appropriate accounting for confounding</li> </ol>                                                                                                                                                             |
| Statistical analysis and reporting | <ol style="list-style-type: none"> <li>1. Presentation of analytical strategy</li> <li>2. Reporting of results</li> </ol>                                                                                                                                                                                                                           |
